# Supplementary material for: Pregnancy outcomes and iron status in β-thalassemia major and intermedia: a systematic review and meta-analysis
Source: PubMed Central journal article supplement — Blood Adv. 2024 Jan 8;8(3):746–57. doi: 10.1182/bloodadvances.2023011636 (PMC10847873; doi:10.1182/bloodadvances.2023011636), 2024-01-08
Supplement: BLOODA_ADV-2023-011636-mmc1.pdf [file BLOODA_ADV-2023-011636-mmc1.pdf]

## Supplemental figures

Figure 1. Forest plots for proportional metaanalyses in TDT

### a. Mortality

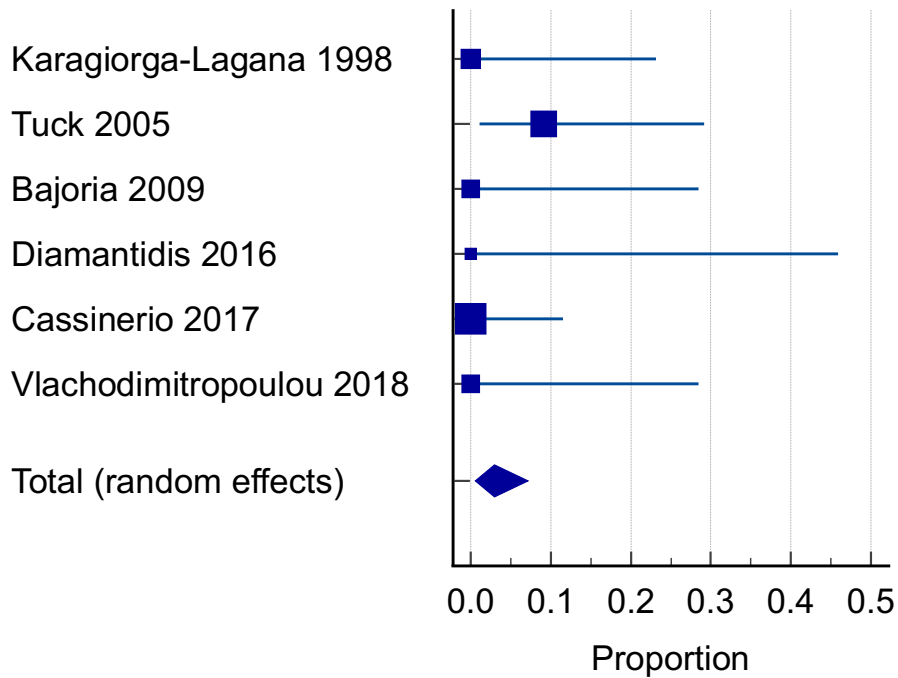

### b. Pre-eclampsia

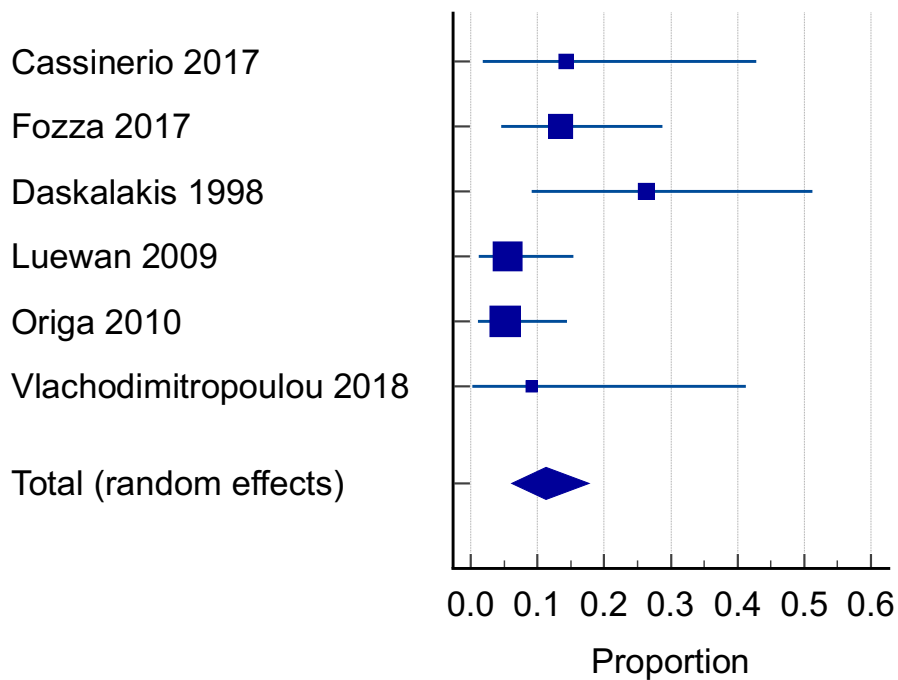

**c. GDM**

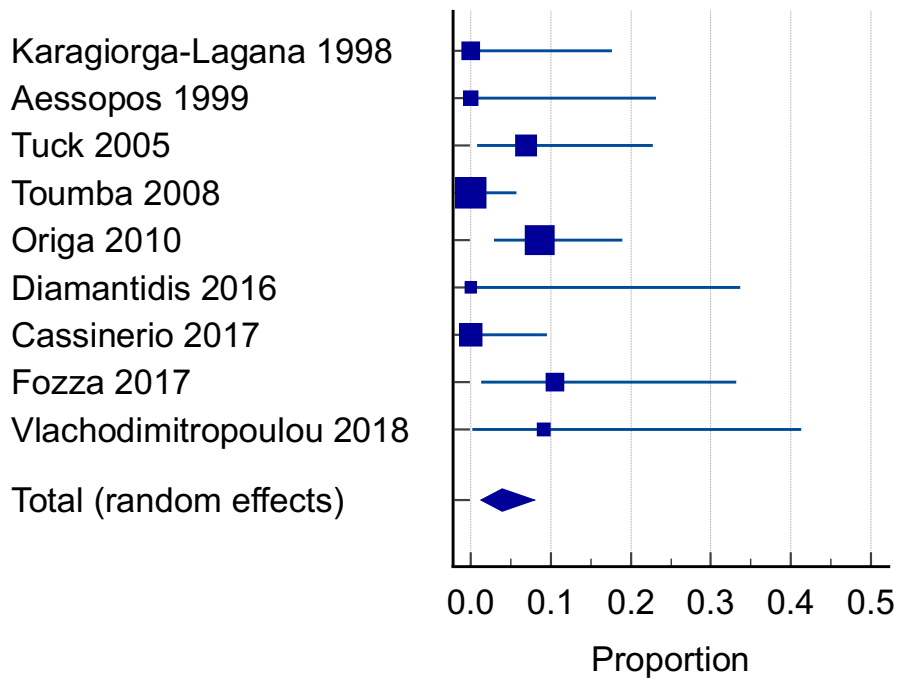

**d. VTE**

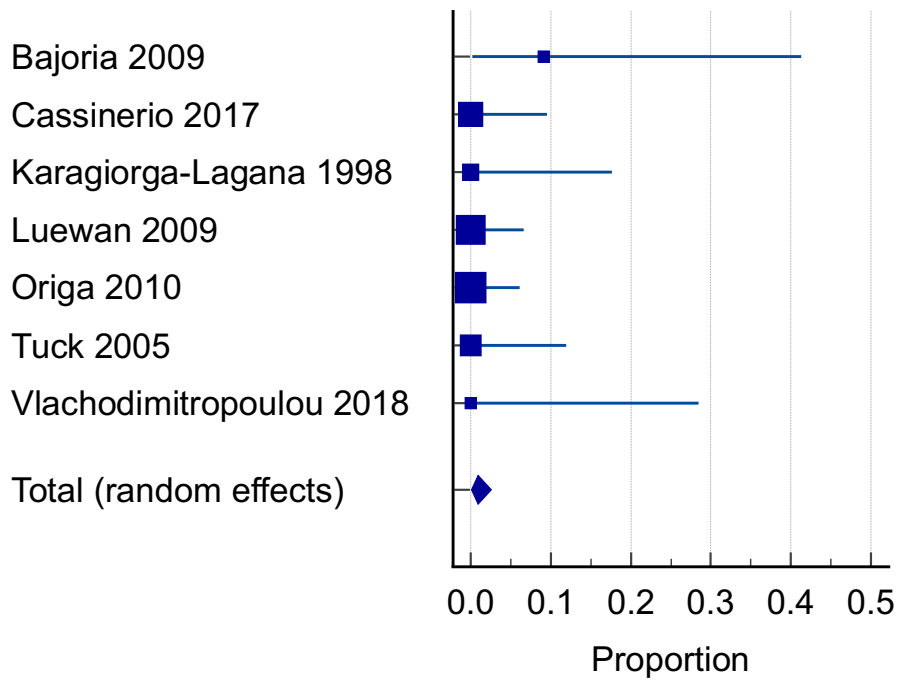

**e. Heart failure**

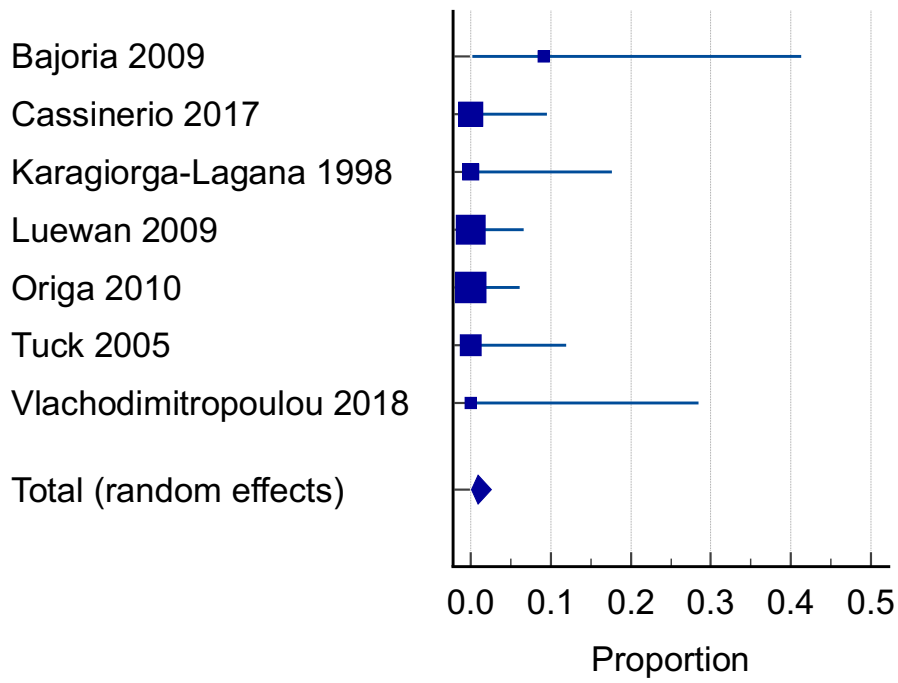

**f. Caesarean section**

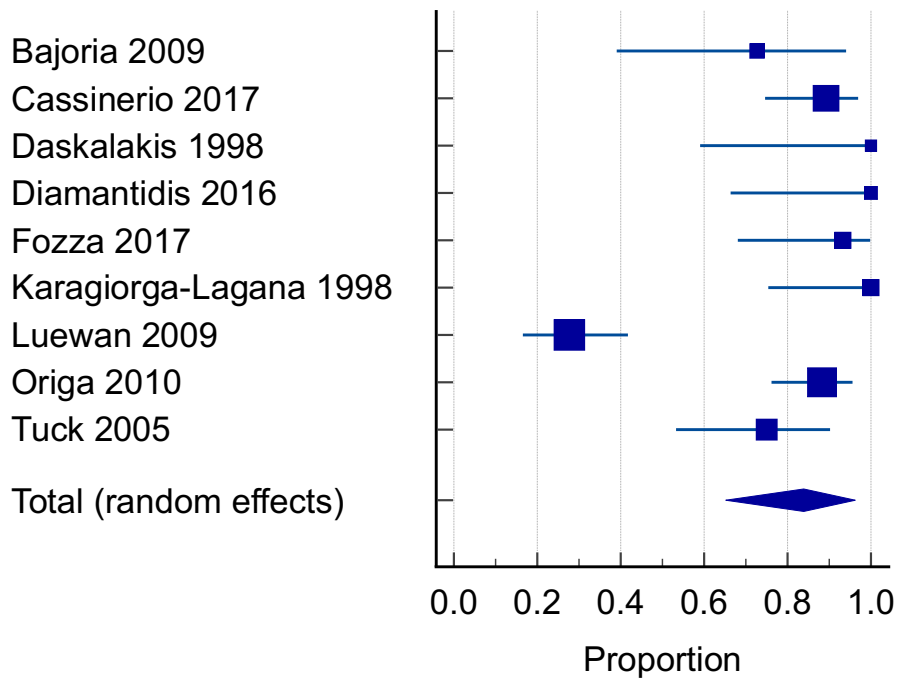

**g. Miscarriage**

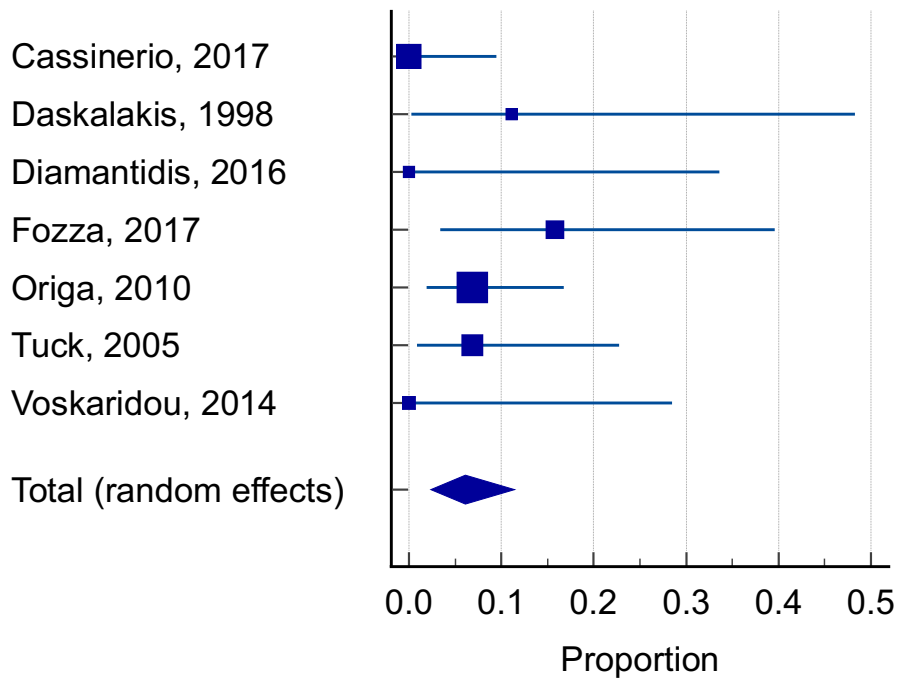

**h. Live birth**

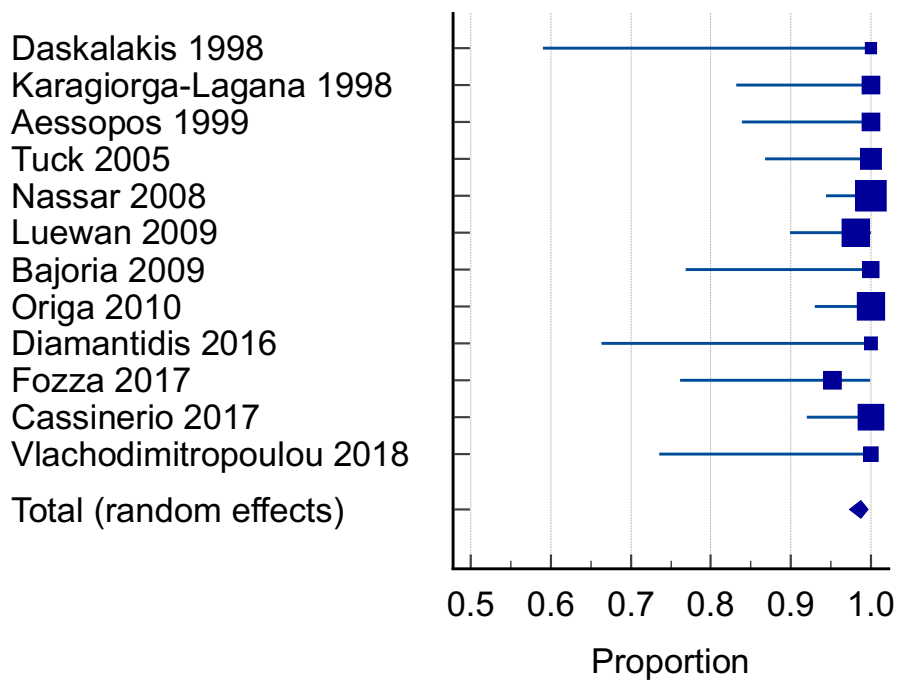

**i. Still birth rate**

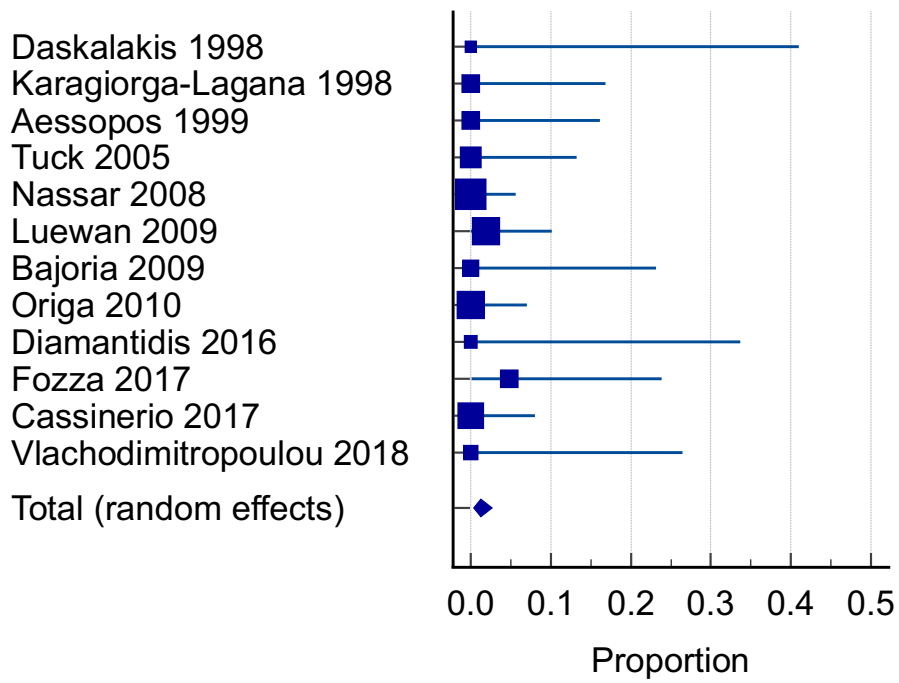

**j. Small for gestational age**

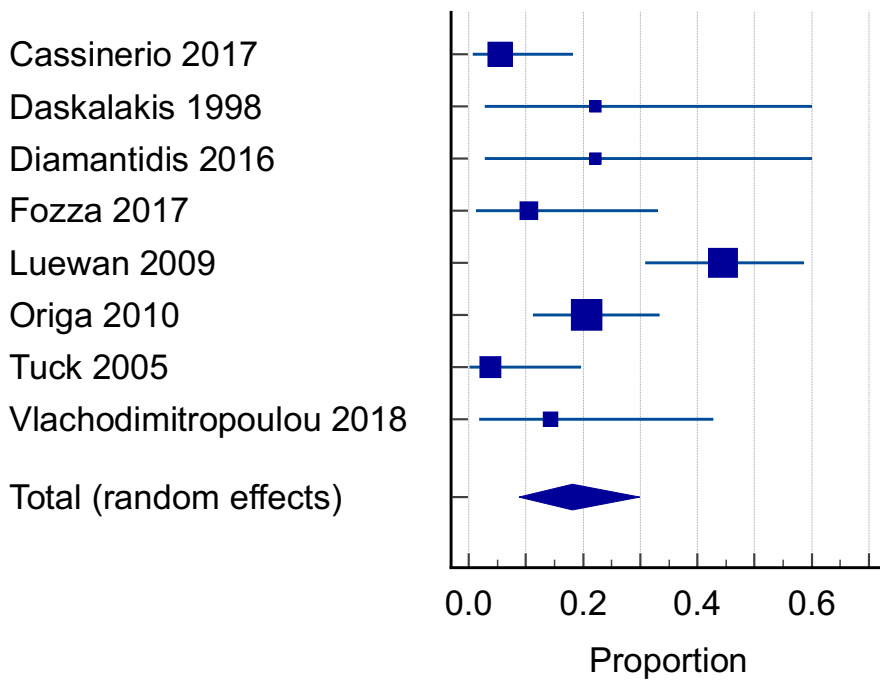

**k. Preterm birth < 37 weeks**

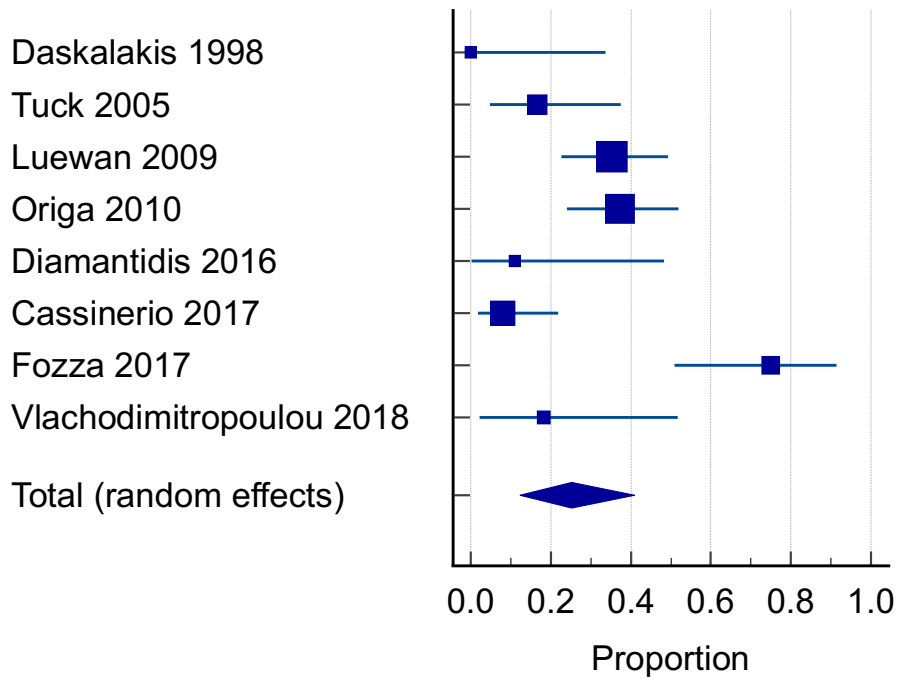

**l. Preterm birth < 37 weeks, excluding multiples**

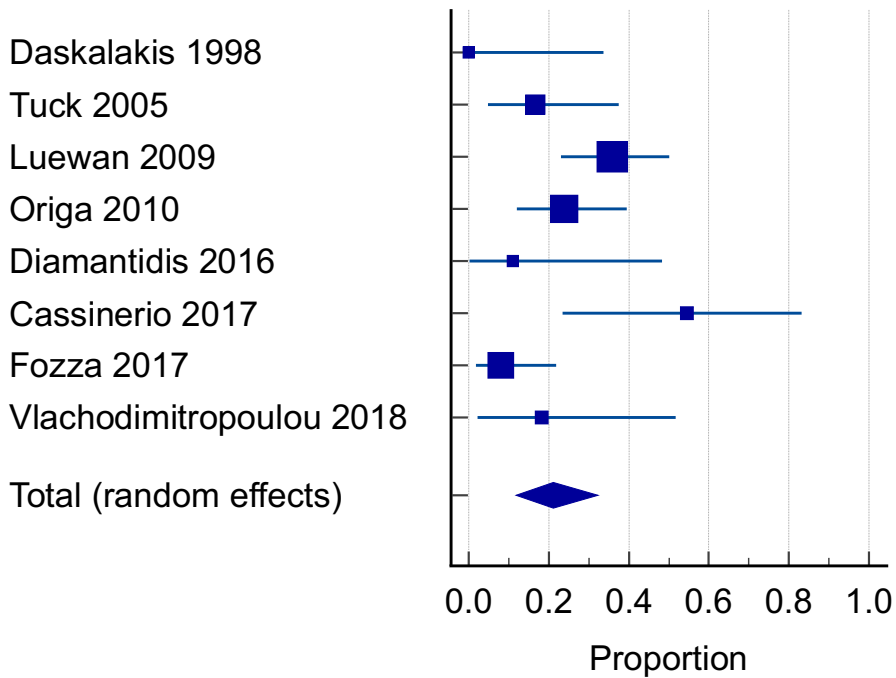

**m. NICU admission**

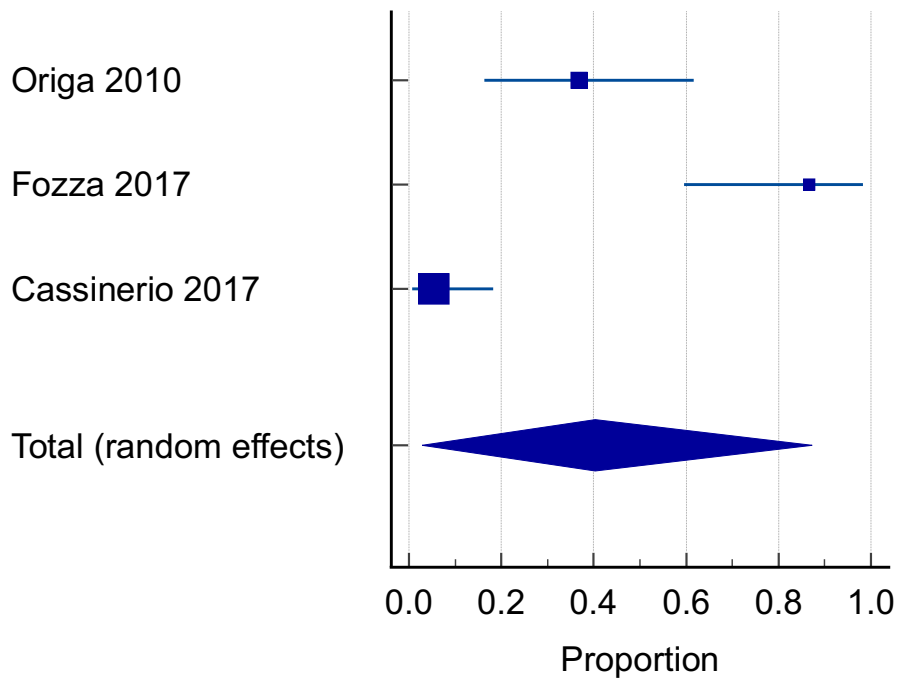

**Figure 2. Forest plots for proportional metaanalyses in TDT**

**a. VTE**

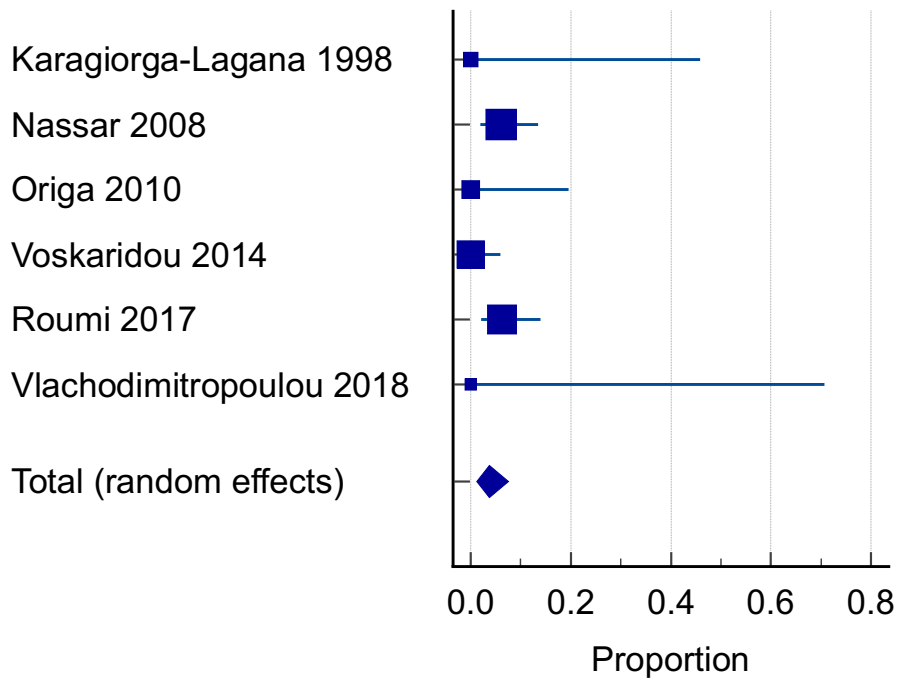

**b. Heart failure**

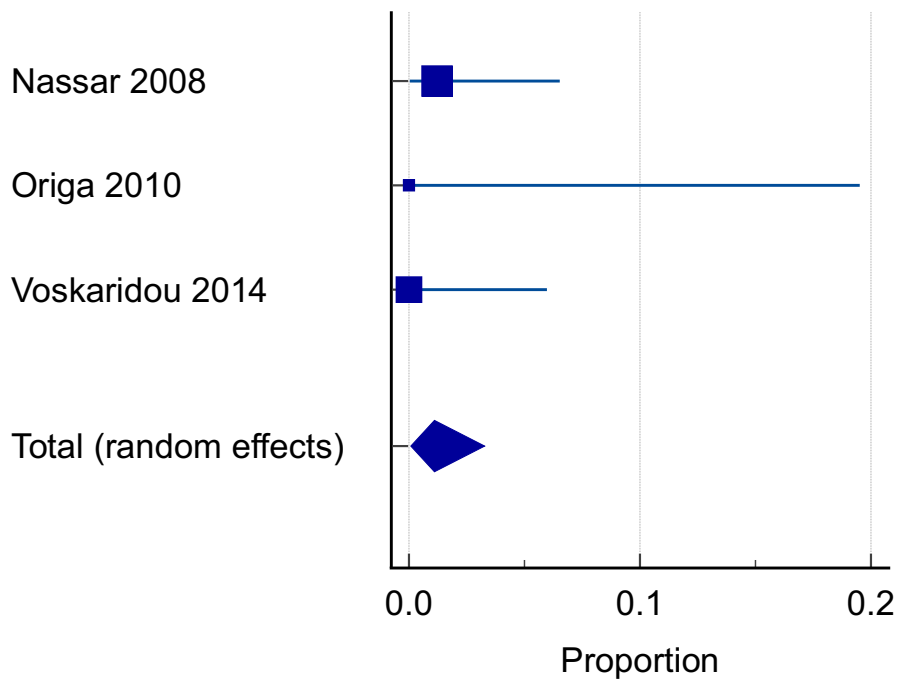



**c. Caesarean section**

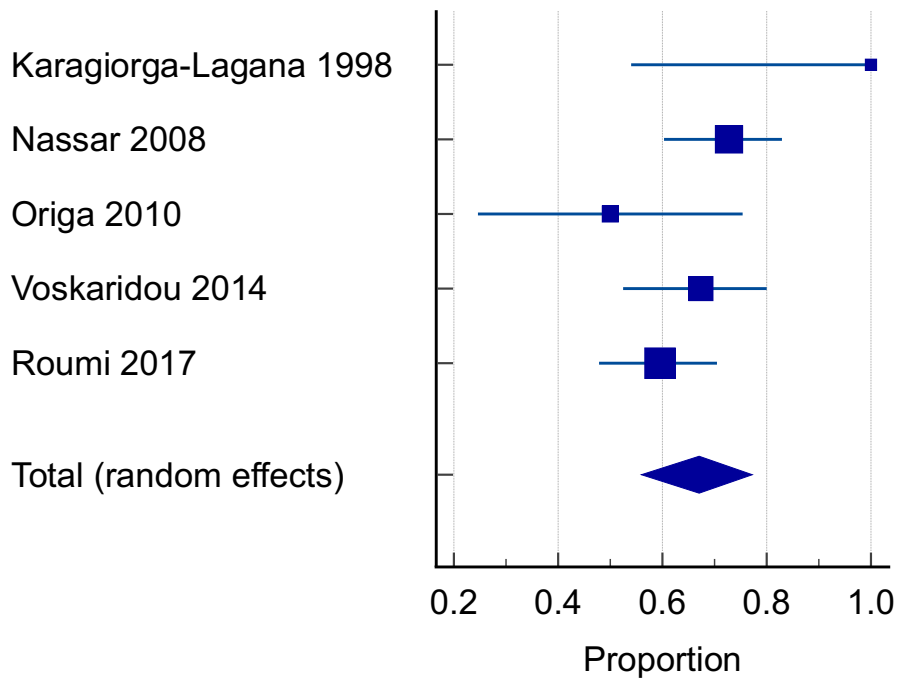

**d. Miscarriage**

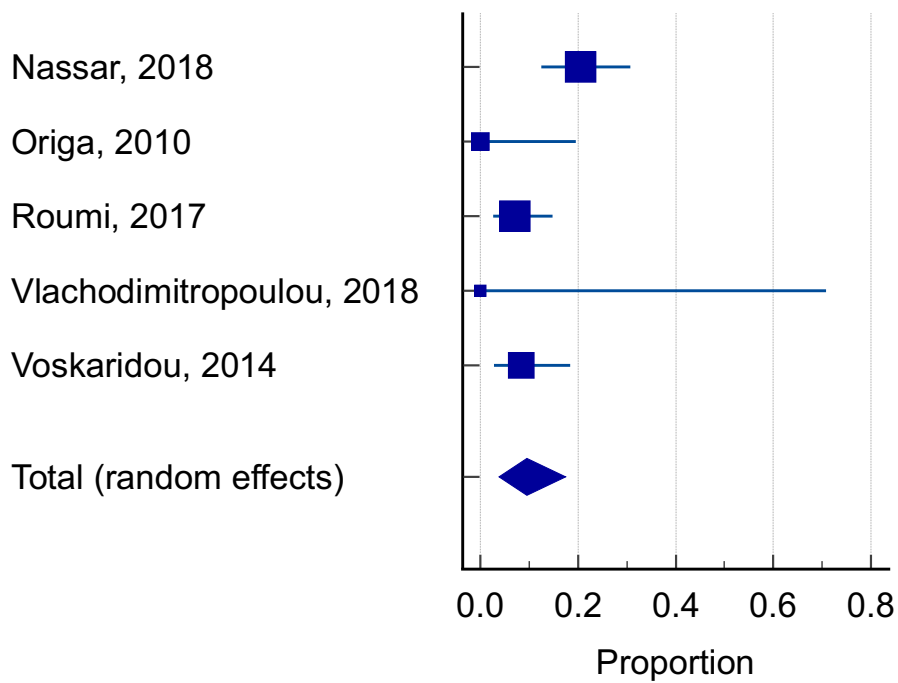

**e. Live birth**

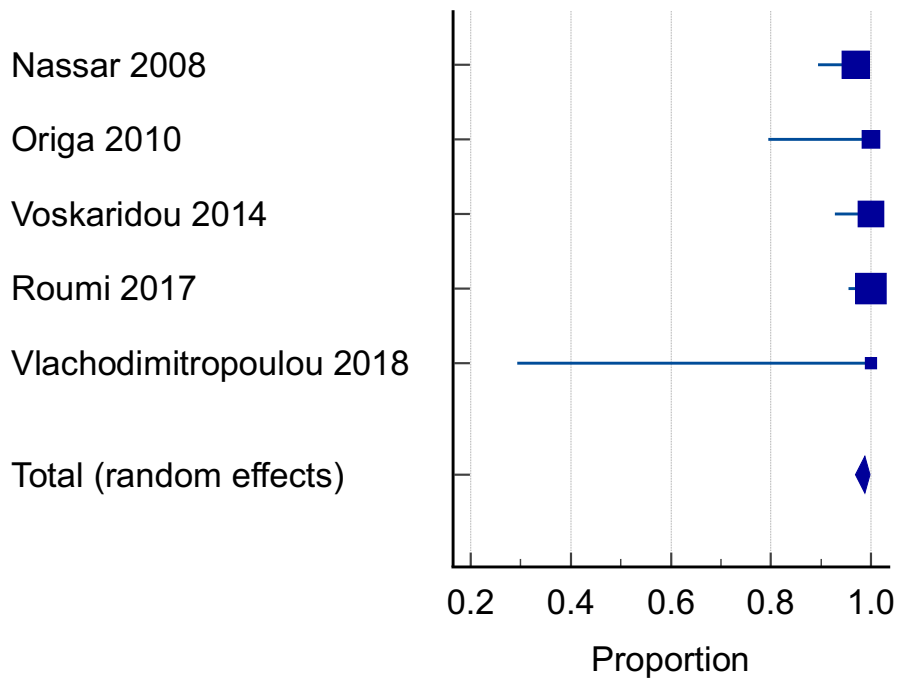

**f. Small for gestational age**

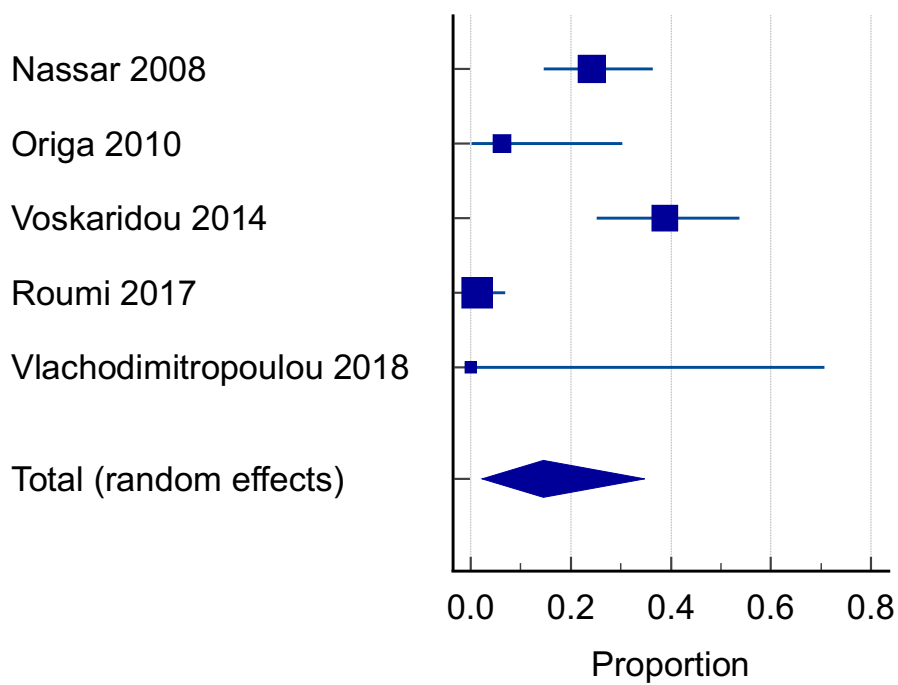

**g. Preterm birth < 37 weeks**

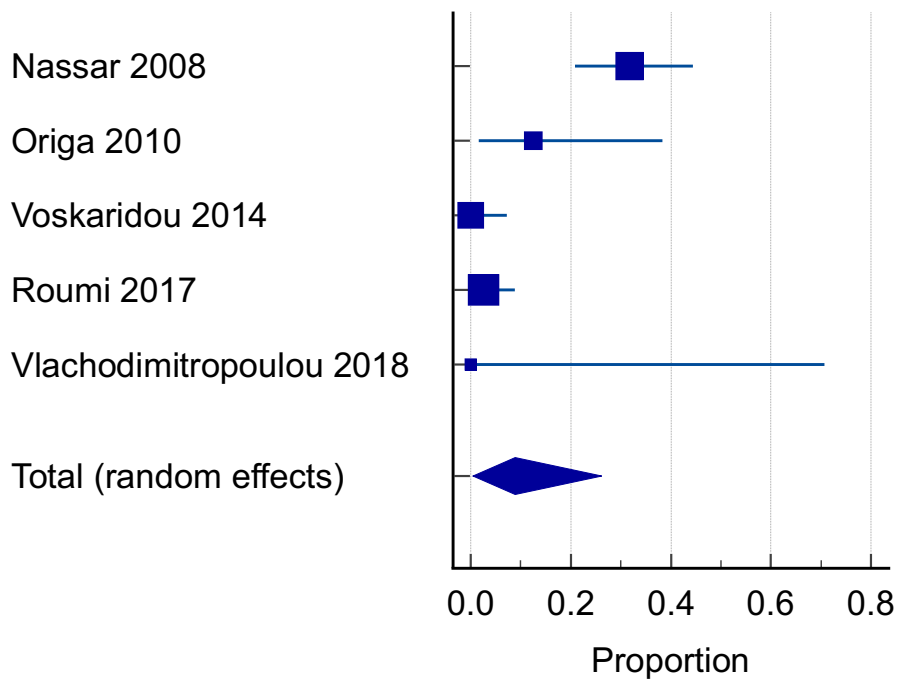

Supplemental Table 1: Risk of bias assessment of descriptive and cohort studies in pregnant patients with beta-thalassemia major and beta-thalassemia intermedia

| Author (year)            | <u>Risk of bias assessment (NOS)</u> |                                                                              |                                                                                      |                                       |                                    |                                                        |                                                       |                                                            |                                                                             |                                  |
|--------------------------|--------------------------------------|------------------------------------------------------------------------------|--------------------------------------------------------------------------------------|---------------------------------------|------------------------------------|--------------------------------------------------------|-------------------------------------------------------|------------------------------------------------------------|-----------------------------------------------------------------------------|----------------------------------|
| Case-Series              | Clear criteria for inclusion?        | Condition measured in a standard, reliable way for all included participants | Valid methods used for identification of the condition for all included participants | Consecutive inclusion of participants | Complete inclusion of participants | Clear reporting of demographics for study participants | Clear reporting of participants' clinical information | Clear reporting of outcomes or follow-up results for cases | Clear reporting of the presenting site(s)/clinic(s) demographic information | Appropriate statistical analysis |
| Aessopos (1999)          | Yes                                  | Yes                                                                          | Unclear                                                                              | Yes                                   | Yes                                | No                                                     | Yes                                                   | Yes                                                        | No                                                                          | Unclear                          |
| Bajoria (2009)           | Yes                                  | Unclear                                                                      | Unclear                                                                              | Unclear                               | Unclear                            | No                                                     | No                                                    | No                                                         | No                                                                          | Yes                              |
| Cassinero (2017)         | Yes                                  | Unclear                                                                      | Unclear                                                                              | Unclear                               | Unclear                            | Yes                                                    | Yes                                                   | Yes                                                        | Yes                                                                         | Yes                              |
| Daskalakis (1998)        | Yes                                  | Yes                                                                          | Yes                                                                                  | Unclear                               | Unclear                            | No                                                     | Yes                                                   | Yes                                                        | No                                                                          | Yes                              |
| Diamantidis (2016)       | Yes                                  | Unclear                                                                      | Unclear                                                                              | Unclear                               | Yes                                | No                                                     | Yes                                                   | Yes                                                        | No                                                                          | Yes                              |
| Fozza (2017)             | Yes                                  | Unclear                                                                      | Unclear                                                                              | Unclear                               | Unclear                            | No                                                     | No                                                    | Yes                                                        | No                                                                          | Yes                              |
| Karagiorga-Lagana (1998) | Yes                                  | Unclear                                                                      | Unclear                                                                              | Unclear                               | Unclear                            | Yes                                                    | Yes                                                   | Yes                                                        | No                                                                          | Yes                              |
| Nassar (2008)            | Yes                                  | Unclear                                                                      | Unclear                                                                              | Unclear                               | Unclear                            | No                                                     | No                                                    | Yes                                                        | No                                                                          | Yes                              |
| Origa (2010)             | Yes                                  | Yes                                                                          | Unclear                                                                              | Yes                                   | Yes                                | Yes                                                    | Yes                                                   | Yes                                                        | Yes                                                                         | Yes                              |
| Roumi (2017)             | Yes                                  | Yes                                                                          | Yes                                                                                  | Unclear                               | Unclear                            | No                                                     | Yes                                                   | Yes                                                        | No                                                                          | Yes                              |

|                            |                  |         |                      |         |                |         |                |     |                                                          |     |
|----------------------------|------------------|---------|----------------------|---------|----------------|---------|----------------|-----|----------------------------------------------------------|-----|
| Toumba (2008)              | Yes              | Unclear | Unclear              | Yes     | Yes            | No      | No             | No  | Yes                                                      | Yes |
| Tuck (2005)                | Yes              | Unclear | Unclear              | Unclear | Unclear        | Unclear | Yes            | Yes | No                                                       | Yes |
| Vlachodimitropoulou (2018) | Yes              | Unclear | Unclear              | Yes     | Yes            | Yes     | Yes            | Yes | Yes                                                      | Yes |
| Voskaridou (2014)          | Yes              | Yes     | Yes                  | Unclear | Yes            | Yes     | Yes            | Yes | Yes                                                      | Yes |
| <b>Cohort Studies</b>      | <b>Selection</b> |         | <b>Comparability</b> |         | <b>Outcome</b> |         | <b>Total/9</b> |     | <b>Risk of bias (1-3: high, 4-6: moderate, 7-9: low)</b> |     |
| Luewan (2009)              | ****             |         | **                   |         | ***            |         | 9/9            |     | Low                                                      |     |
